# Supplementary material for: Corneal confocal microscopy for assessment of diabetic peripheral neuropathy: a meta-analysis
Source: HighWire-hosted journal article supplement (doi:10.1136/bjophthalmol-2014-306038), 2015-02-12
Supplement: bjophthalmol-2014-306038supp_table.pdf [file bjophthalmol-2014-306038supp_table.pdf]

Table s1. Characteristics of included studies about subgroup analysis

| Study                         | Groups   | N   | Type of CCM | The ages are relatively balanced between groups |    | Interpreting the image was masked to the DPN status of the patient |           | Assessment with CCM |     |     |    |
|-------------------------------|----------|-----|-------------|-------------------------------------------------|----|--------------------------------------------------------------------|-----------|---------------------|-----|-----|----|
|                               |          |     |             | Yes                                             | No | yes                                                                | No report | NFD                 | NBD | NFL | TC |
|                               |          |     |             |                                                 |    |                                                                    |           |                     |     |     |    |
| Ahmed <sup>5</sup>            | Controls | 64  | LSCM        |                                                 | √  |                                                                    | √         | √                   | √   | √   | √  |
|                               | No-DPN   | 56  |             |                                                 |    |                                                                    |           | √                   | √   | √   | √  |
|                               | DPN      | 33  |             |                                                 |    |                                                                    |           | √                   | √   | √   | √  |
| Edwards <sup>6</sup>          | Controls | 61  | LSCM        |                                                 | √  |                                                                    | √         |                     | √   | √   | √  |
|                               | No-DPN   | 143 |             |                                                 |    |                                                                    |           |                     | √   | √   | √  |
|                               | DPN      | 88  |             |                                                 |    |                                                                    |           |                     | √   | √   | √  |
| Hertz <sup>7</sup>            | controls | 20  | LSCM        | √                                               |    | √                                                                  |           | √                   | √   | √   | √  |
|                               | No-DPN   | 12  |             |                                                 |    |                                                                    |           | √                   | √   | √   | √  |
|                               | DPN      | 14  |             |                                                 |    |                                                                    |           | √                   | √   | √   | √  |
| Kallinikos <sup>8</sup>       | controls | 18  | SSCM        | √                                               |    |                                                                    | √         |                     |     |     | √  |
|                               | DPN      | 18  |             |                                                 |    |                                                                    |           |                     |     |     | √  |
| Malik <sup>9</sup>            | controls | 18  | SSCM        | √                                               |    | √                                                                  |           | √                   | √   | √   |    |
|                               | DPN      | 18  |             |                                                 |    |                                                                    |           | √                   | √   | √   |    |
| Mehra <sup>10</sup>           | controls | 15  | SSCM        | √                                               |    | √                                                                  |           | √                   | √   | √   | √  |
|                               | DPN      | 20  |             |                                                 |    |                                                                    |           | √                   | √   | √   | √  |
| Petropoulos <sup>11</sup>     | controls | 55  | LSCM        | √                                               |    | √                                                                  |           | √                   | √   | √   |    |
|                               | No-DPN   | 86  |             |                                                 |    |                                                                    |           | √                   | √   | √   |    |
|                               | DPN      | 100 |             |                                                 |    |                                                                    |           | √                   | √   | √   |    |
| Pritchard <sup>12</sup>       | controls | 154 | LSCM        |                                                 | √  | √                                                                  |           |                     | √   | √   |    |
|                               | No-DPN   | 168 |             |                                                 |    |                                                                    |           |                     | √   | √   |    |
|                               | DPN      | 74  |             |                                                 |    |                                                                    |           |                     | √   | √   |    |
| Quattrini <sup>13</sup>       | controls | 15  | SSCM        | √                                               |    |                                                                    | √         | √                   | √   | √   |    |
|                               | No-DPN   | 10  |             |                                                 |    |                                                                    |           | √                   | √   | √   |    |
|                               | DPN      | 44  |             |                                                 |    |                                                                    |           | √                   | √   | √   |    |
| Sivaskandarajah <sup>14</sup> | controls | 64  | LSCM        |                                                 | √  |                                                                    | √         | √                   | √   | √   | √  |
|                               | No-DPN   | 63  |             |                                                 |    |                                                                    |           | √                   | √   | √   | √  |
|                               | DPN      | 33  |             |                                                 |    |                                                                    |           | √                   | √   | √   | √  |
| Tavakoli(2010) <sup>15</sup>  | controls | 17  | SSCM        | √                                               |    | √                                                                  |           | √                   | √   | √   |    |
|                               | No-DPN   | 34  |             |                                                 |    |                                                                    |           | √                   | √   | √   |    |
|                               | DPN      | 67  |             |                                                 |    |                                                                    |           | √                   | √   | √   |    |
| Tavakoli(2011) <sup>16</sup>  | controls | 18  | SSCM        | √                                               |    | √                                                                  |           | √                   | √   | √   | √  |
|                               | DPN      | 25  |             |                                                 |    |                                                                    |           | √                   | √   | √   | √  |
| Xue <sup>17</sup>             | controls | 10  | LSCM        | √                                               |    |                                                                    | √         |                     | √   | √   | √  |
|                               | No-DPN   | 20  |             |                                                 |    |                                                                    |           |                     | √   | √   | √  |
|                               | DPN      | 25  | LSCM        |                                                 |    |                                                                    |           |                     | √   | √   | √  |
